# Supplementary material
Source: publisher figshare collection journal article supplement (https://acs.figshare.com/ndownloader/files/4377829)
Supplement: Supplementary file 1 [file 4377829]

 
data_compound2
 
_audit_creation_method            SHELXL-97
_chemical_name_systematic
;
 ?
;
_chemical_name_common             ?
_chemical_melting_point           ?
_chemical_formula_moiety          ?
_chemical_formula_sum
 'C46 H56 In4 K3 N26 O27.50'
_chemical_formula_weight          1989.75
 
loop_
 _atom_type_symbol
 _atom_type_description
 _atom_type_scat_dispersion_real
 _atom_type_scat_dispersion_imag
 _atom_type_scat_source
 'C'  'C'   0.0033   0.0016
 'International Tables Vol C Tables 4.2.6.8 and 6.1.1.4'
 'H'  'H'   0.0000   0.0000
 'International Tables Vol C Tables 4.2.6.8 and 6.1.1.4'
 'N'  'N'   0.0061   0.0033
 'International Tables Vol C Tables 4.2.6.8 and 6.1.1.4'
 'O'  'O'   0.0106   0.0060
 'International Tables Vol C Tables 4.2.6.8 and 6.1.1.4'
 'K'  'K'   0.2009   0.2494
 'International Tables Vol C Tables 4.2.6.8 and 6.1.1.4'
 'In'  'In'  -0.7276   1.3100
 'International Tables Vol C Tables 4.2.6.8 and 6.1.1.4'
 
_symmetry_cell_setting            cubic
_symmetry_space_group_name_H-M    Im-3
 
loop_
 _symmetry_equiv_pos_as_xyz
 'x, y, z'
 '-x, -y, z'
 '-x, y, -z'
 'x, -y, -z'
 'z, x, y'
 'z, -x, -y'
 '-z, -x, y'
 '-z, x, -y'
 'y, z, x'
 '-y, z, -x'
 'y, -z, -x'
 '-y, -z, x'
 'x+1/2, y+1/2, z+1/2'
 '-x+1/2, -y+1/2, z+1/2'
 '-x+1/2, y+1/2, -z+1/2'
 'x+1/2, -y+1/2, -z+1/2'
 'z+1/2, x+1/2, y+1/2'
 'z+1/2, -x+1/2, -y+1/2'
 '-z+1/2, -x+1/2, y+1/2'
 '-z+1/2, x+1/2, -y+1/2'
 'y+1/2, z+1/2, x+1/2'
 '-y+1/2, z+1/2, -x+1/2'
 'y+1/2, -z+1/2, -x+1/2'
 '-y+1/2, -z+1/2, x+1/2'
 '-x, -y, -z'
 'x, y, -z'
 'x, -y, z'
 '-x, y, z'
 '-z, -x, -y'
 '-z, x, y'
 'z, x, -y'
 'z, -x, y'
 '-y, -z, -x'
 'y, -z, x'
 '-y, z, x'
 'y, z, -x'
 '-x+1/2, -y+1/2, -z+1/2'
 'x+1/2, y+1/2, -z+1/2'
 'x+1/2, -y+1/2, z+1/2'
 '-x+1/2, y+1/2, z+1/2'
 '-z+1/2, -x+1/2, -y+1/2'
 '-z+1/2, x+1/2, y+1/2'
 'z+1/2, x+1/2, -y+1/2'
 'z+1/2, -x+1/2, y+1/2'
 '-y+1/2, -z+1/2, -x+1/2'
 'y+1/2, -z+1/2, x+1/2'
 '-y+1/2, z+1/2, x+1/2'
 'y+1/2, z+1/2, -x+1/2'
 
_cell_length_a                    29.319(3)
_cell_length_b                    29.319(3)
_cell_length_c                    29.319(3)
_cell_angle_alpha                 90.00
_cell_angle_beta                  90.00
_cell_angle_gamma                 90.00
_cell_volume                      25202(5)
_cell_formula_units_Z             12
_cell_measurement_temperature     293(2)
_cell_measurement_reflns_used     ?
_cell_measurement_theta_min       ?
_cell_measurement_theta_max       ?
 
_exptl_crystal_description        block
_exptl_crystal_colour             colorless
_exptl_crystal_size_max           0.22
_exptl_crystal_size_mid           0.21
_exptl_crystal_size_min           0.20
_exptl_crystal_density_meas       ?
_exptl_crystal_density_diffrn     1.573
_exptl_crystal_density_method     'not measured'
_exptl_crystal_F_000              11844
_exptl_absorpt_coefficient_mu     1.316
_exptl_absorpt_correction_type    multi-scan
_exptl_absorpt_correction_T_min   0.7606
_exptl_absorpt_correction_T_max   0.7788
_exptl_absorpt_process_details    ?
 
_exptl_special_details
;
 ?
;
 
_diffrn_ambient_temperature       293(2)
_diffrn_radiation_wavelength      0.71073
_diffrn_radiation_type            MoK\a
_diffrn_radiation_source          'fine-focus sealed tube'
_diffrn_radiation_monochromator   graphite
_diffrn_measurement_device_type   'Rigaku RAXIS-RAPID'
_diffrn_measurement_method        'omega scans' 
_diffrn_detector_area_resol_mean  ?
_diffrn_standards_number          ?
_diffrn_standards_interval_count  ?
_diffrn_standards_interval_time   ?
_diffrn_standards_decay_%         ?
_diffrn_reflns_number             107375
_diffrn_reflns_av_R_equivalents   0.1191
_diffrn_reflns_av_sigmaI/netI     0.0359
_diffrn_reflns_limit_h_min        -37
_diffrn_reflns_limit_h_max        37
_diffrn_reflns_limit_k_min        -35
_diffrn_reflns_limit_k_max        37
_diffrn_reflns_limit_l_min        -34
_diffrn_reflns_limit_l_max        37
_diffrn_reflns_theta_min          3.11
_diffrn_reflns_theta_max          26.99
_reflns_number_total              4862
_reflns_number_gt                 3584
_reflns_threshold_expression      >2sigma(I)
 
_computing_data_collection        ?
_computing_cell_refinement        ?
_computing_data_reduction         ?
_computing_structure_solution     ?
_computing_structure_refinement   'SHELXL-97 (Sheldrick, 1997)'
_computing_molecular_graphics     ?
_computing_publication_material   ?
 
_refine_special_details
;
 Refinement of F^2^ against ALL reflections.  The weighted R-factor wR and
 goodness of fit S are based on F^2^, conventional R-factors R are based
 on F, with F set to zero for negative F^2^. The threshold expression of
 F^2^ > 2sigma(F^2^) is used only for calculating R-factors(gt) etc. and is
 not relevant to the choice of reflections for refinement.  R-factors based
 on F^2^ are statistically about twice as large as those based on F, and R-
 factors based on ALL data will be even larger.
;
 
_refine_ls_structure_factor_coef  Fsqd
_refine_ls_matrix_type            full
_refine_ls_weighting_scheme       calc
_refine_ls_weighting_details
 'calc w=1/[\s^2^(Fo^2^)+(0.0808P)^2^+88.7864P] where P=(Fo^2^+2Fc^2^)/3'
_atom_sites_solution_primary      direct
_atom_sites_solution_secondary    difmap
_atom_sites_solution_hydrogens    geom
_refine_ls_hydrogen_treatment     constr
_refine_ls_extinction_method      none
_refine_ls_extinction_coef        ?
_refine_ls_number_reflns          4862
_refine_ls_number_parameters      320
_refine_ls_number_restraints      14
_refine_ls_R_factor_all           0.0737
_refine_ls_R_factor_gt            0.0497
_refine_ls_wR_factor_ref          0.1464
_refine_ls_wR_factor_gt           0.1343
_refine_ls_goodness_of_fit_ref    1.040
_refine_ls_restrained_S_all       1.041
_refine_ls_shift/su_max           0.001
_refine_ls_shift/su_mean          0.000
 
loop_
 _atom_site_label
 _atom_site_type_symbol
 _atom_site_fract_x
 _atom_site_fract_y
 _atom_site_fract_z
 _atom_site_U_iso_or_equiv
 _atom_site_adp_type
 _atom_site_occupancy
 _atom_site_symmetry_multiplicity
 _atom_site_calc_flag
 _atom_site_refinement_flags
 _atom_site_disorder_assembly
 _atom_site_disorder_group
In1 In 0.216121(12) 0.112862(11) 0.386060(11) 0.03026(14) Uani 1 1 d . A .
K1 K 0.19075(10) 0.0000 0.5000 0.0526(7) Uani 1 4 d S . .
K2 K 0.07551(7) 0.08616(6) 0.5000 0.0483(5) Uani 1 2 d S . .
O1 O 0.28949(11) 0.10199(11) 0.39066(12) 0.0336(8) Uani 1 1 d . . .
O2 O 0.34625(11) 0.05242(11) 0.39646(12) 0.0347(8) Uani 1 1 d . . .
O3 O 0.22391(12) 0.18520(11) 0.39831(11) 0.0365(8) Uani 1 1 d . . .
O4 O 0.22980(14) 0.24185(12) 0.44863(13) 0.0444(9) Uani 1 1 d . . .
N1 N 0.22695(13) 0.03668(13) 0.38367(13) 0.0290(9) Uani 1 1 d . . .
N2 N 0.19971(19) 0.0000 0.3811(2) 0.0334(13) Uani 1 2 d S . .
N3 N 0.21209(13) 0.12262(14) 0.46317(13) 0.0301(9) Uani 1 1 d . . .
N4 N 0.20709(19) 0.0952(2) 0.5000 0.0314(12) Uani 1 2 d S . .
C1 C 0.27071(15) 0.02378(16) 0.38829(15) 0.0271(9) Uani 1 1 d . . .
C2 C 0.30553(16) 0.06075(16) 0.39196(15) 0.0291(10) Uani 1 1 d . . .
C3 C 0.21953(15) 0.16588(16) 0.47644(16) 0.0287(10) Uani 1 1 d . . .
C4 C 0.22497(16) 0.20111(17) 0.43971(17) 0.0331(11) Uani 1 1 d . . .
N5 N 0.14245(14) 0.10647(15) 0.37016(14) 0.0346(9) Uani 1 1 d . . .
H5A H 0.1349 0.0769 0.3668 0.042 Uiso 0.33(2) 1 d PR A .
H5B H 0.1256 0.1183 0.3929 0.042 Uiso 0.33(2) 1 d PR . .
H5C H 0.1317 0.0800 0.3815 0.042 Uiso 0.67(2) 1 d PR . .
H5D H 0.1269 0.1295 0.3832 0.042 Uiso 0.67(2) 1 d PR . .
N6 N 0.21543(14) 0.13266(14) 0.31227(13) 0.0322(9) Uani 1 1 d . . .
H6A H 0.2179 0.1632 0.3099 0.039 Uiso 0.33(2) 1 d PR A .
H6B H 0.2395 0.1200 0.2980 0.039 Uiso 0.33(2) 1 d PR . .
H6C H 0.2322 0.1580 0.3080 0.039 Uiso 0.67(2) 1 d PR . .
H6D H 0.2273 0.1101 0.2951 0.039 Uiso 0.67(2) 1 d PR . .
C5 C 0.1359(3) 0.1069(5) 0.3213(3) 0.035(2) Uani 0.67(2) 1 d P A 1
H5 H 0.1440 0.0767 0.3095 0.042 Uiso 0.67(2) 1 d PR A 1
C6 C 0.1673(3) 0.1423(4) 0.2996(3) 0.032(2) Uani 0.67(2) 1 d P A 1
H6 H 0.1592 0.1723 0.3119 0.038 Uiso 0.67(2) 1 d PR A 1
C8 C 0.1104(6) 0.1533(8) 0.2348(6) 0.073(5) Uani 0.67(2) 1 d P A 1
H8A H 0.1023 0.1846 0.2414 0.088 Uiso 0.67(2) 1 d PR A 1
H8B H 0.1074 0.1490 0.2021 0.088 Uiso 0.67(2) 1 d PR A 1
C9 C 0.0772(6) 0.1199(8) 0.2571(6) 0.072(5) Uani 0.67(2) 1 d P A 1
H9A H 0.0785 0.0899 0.2433 0.086 Uiso 0.67(2) 1 d PR A 1
H9B H 0.0467 0.1318 0.2526 0.086 Uiso 0.67(2) 1 d PR A 1
C5' C 0.1342(7) 0.1324(9) 0.3237(6) 0.035(5) Uani 0.33(2) 1 d P A 2
H5' H 0.1344 0.1655 0.3286 0.042 Uiso 0.33(2) 1 d PR A 2
C6' C 0.1733(7) 0.1198(8) 0.2912(6) 0.034(5) Uani 0.33(2) 1 d P A 2
H6' H 0.1731 0.0868 0.2862 0.040 Uiso 0.33(2) 1 d PR A 2
C8' C 0.1192(13) 0.1285(12) 0.2254(10) 0.072(10) Uani 0.33(2) 1 d P A 2
H8'1 H 0.1184 0.0955 0.2262 0.087 Uiso 0.33(2) 1 d PR A 2
H8'2 H 0.1167 0.1391 0.1941 0.087 Uiso 0.33(2) 1 d PR A 2
C9' C 0.0840(13) 0.1450(13) 0.2555(13) 0.068(10) Uani 0.33(2) 1 d P A 2
H9'1 H 0.0540 0.1423 0.2418 0.082 Uiso 0.33(2) 1 d PR A 2
H9'2 H 0.0905 0.1770 0.2605 0.082 Uiso 0.33(2) 1 d PR A 2
C7 C 0.1616(2) 0.1441(2) 0.24722(18) 0.0493(14) Uani 1 1 d . . .
H7A H 0.1560 0.1758 0.2550 0.059 Uiso 0.33(2) 1 d PR A .
H7B H 0.1872 0.1432 0.2263 0.059 Uiso 0.33(2) 1 d PR . .
H7C H 0.1727 0.1163 0.2333 0.059 Uiso 0.67(2) 1 d PR . .
H7D H 0.1795 0.1693 0.2355 0.059 Uiso 0.67(2) 1 d PR . .
C10 C 0.0864(2) 0.1171(2) 0.3075(2) 0.0562(16) Uani 1 1 d . . .
H10A H 0.0621 0.1260 0.3281 0.067 Uiso 0.33(2) 1 d PR A .
H10B H 0.0857 0.0843 0.3029 0.067 Uiso 0.33(2) 1 d PR . .
H10C H 0.0674 0.0926 0.3193 0.067 Uiso 0.67(2) 1 d PR . .
H10D H 0.0766 0.1450 0.3223 0.067 Uiso 0.67(2) 1 d PR . .
O5 O 0.12422(16) 0.03653(13) 0.43984(15) 0.0569(11) Uani 1 1 d . . .
O6 O 0.0932(2) 0.0000 0.3844(3) 0.085(2) Uani 1 2 d S . .
N7 N 0.1131(2) 0.0000 0.4217(3) 0.0500(17) Uani 1 2 d S . .
O11 O 0.2138(3) 0.2666(4) 0.2658(3) 0.060(2) Uani 0.50 1 d P . .
N11 N 0.2500 0.2500 0.2500 0.040(2) Uani 1 6 d S . .
O21 O 0.2845(10) 0.0372(9) 0.5000 0.105(10) Uiso 0.33 2 d SPD . .
N21 N 0.3041(13) 0.0000 0.5000 0.084 Uiso 0.33 4 d SPD . .
O22 O 0.3467(12) 0.0000 0.5000 0.100(11) Uiso 0.33 4 d SPD . .
C31 C 0.0000 0.1723(4) 0.3993(6) 0.069(4) Uani 0.67 2 d SPD . .
C32A C 0.0000 0.1276(5) 0.4135(7) 0.030(4) Uani 0.33 2 d SPDU B 1
N31A N 0.0000 0.0907(6) 0.4251(8) 0.050(5) Uani 0.33 2 d SPD . 1
C32B C 0.0000 0.1882(8) 0.4478(6) 0.048(6) Uiso 0.33 2 d SPD . 2
N31B N 0.0000 0.2093(8) 0.4822(7) 0.057(6) Uiso 0.33 2 d SPD . 2
O41 O 0.2042(14) 0.1836(13) 0.0000 0.088(12) Uiso 0.25 2 d SP . .
N41 N 0.2241(9) 0.1777(9) 0.0000 0.088(7) Uiso 0.50 2 d SPD . .
C42 C 0.2602(13) 0.0973(11) 0.0000 0.145(13) Uiso 0.50 2 d SPD . .
C43 C 0.2394(13) 0.1420(10) 0.0000 0.139(12) Uiso 0.50 2 d SPD . .
C51 C 0.0000 0.0000 0.3048(18) 0.171(18) Uiso 0.67 4 d SP . .
C52 C 0.0000 0.0000 0.3465(16) 0.146(14) Uiso 0.67 4 d SP . .
N51 N 0.0000 0.0000 0.3929(3) 0.0345(18) Uiso 0.67 4 d SP . .
O51 O 0.0000 0.0000 0.3929(3) 0.0345(18) Uiso 0.33 4 d SP . .
O61 O 0.0368(3) 0.0000 0.4873(3) 0.039(2) Uiso 0.50 2 d SP . .
O62 O 0.0000 0.0490(10) 0.4655(10) 0.035(6) Uiso 0.17 2 d SP . .
O63 O 0.0000 0.0152(7) 0.5000 0.048(6) Uiso 0.33 4 d SP . .
 
loop_
 _atom_site_aniso_label
 _atom_site_aniso_U_11
 _atom_site_aniso_U_22
 _atom_site_aniso_U_33
 _atom_site_aniso_U_23
 _atom_site_aniso_U_13
 _atom_site_aniso_U_12
In1 0.0328(2) 0.0291(2) 0.0289(2) 0.00107(14) -0.00024(14) 0.00323(14)
K1 0.0555(16) 0.0366(13) 0.0656(17) 0.000 0.000 0.000
K2 0.0710(12) 0.0334(9) 0.0403(9) 0.000 0.000 -0.0103(8)
O1 0.0299(18) 0.0289(17) 0.042(2) 0.0048(15) -0.0022(15) -0.0017(14)
O2 0.0278(18) 0.0328(18) 0.044(2) 0.0044(15) -0.0010(15) -0.0021(15)
O3 0.050(2) 0.0277(17) 0.0313(18) 0.0035(14) -0.0030(16) 0.0007(16)
O4 0.064(3) 0.0284(19) 0.041(2) -0.0003(16) -0.0037(19) -0.0029(17)
N1 0.028(2) 0.028(2) 0.030(2) -0.0003(17) 0.0011(16) -0.0009(16)
N2 0.027(3) 0.033(3) 0.041(3) 0.000 0.000(3) 0.000
N3 0.030(2) 0.034(2) 0.027(2) 0.0012(17) -0.0023(16) 0.0026(17)
N4 0.029(3) 0.035(3) 0.030(3) 0.000 0.000 -0.003(2)
C1 0.028(2) 0.030(2) 0.023(2) -0.0017(19) 0.0015(18) 0.0019(19)
C2 0.033(3) 0.031(2) 0.024(2) 0.0037(19) 0.0005(19) -0.005(2)
C3 0.027(2) 0.026(2) 0.033(2) 0.001(2) -0.002(2) 0.0042(19)
C4 0.030(3) 0.031(3) 0.037(3) 0.003(2) -0.001(2) 0.002(2)
N5 0.034(2) 0.041(2) 0.028(2) -0.0004(18) 0.0053(18) 0.0006(19)
N6 0.036(2) 0.027(2) 0.033(2) 0.0036(17) 0.0073(18) 0.0063(18)
C5 0.037(5) 0.035(6) 0.032(4) 0.001(4) -0.001(3) -0.004(4)
C6 0.039(4) 0.030(6) 0.026(4) 0.002(4) 0.000(3) 0.006(4)
C8 0.048(7) 0.116(14) 0.057(9) 0.039(10) -0.011(6) -0.021(10)
C9 0.045(6) 0.125(15) 0.047(7) 0.028(11) -0.013(5) -0.020(10)
C5' 0.056(11) 0.026(11) 0.024(8) 0.003(8) -0.008(7) 0.000(9)
C6' 0.061(12) 0.018(9) 0.021(8) -0.011(7) -0.012(7) 0.004(9)
C8' 0.10(3) 0.070(18) 0.044(14) 0.005(14) -0.036(15) 0.003(17)
C9' 0.06(2) 0.09(2) 0.054(19) -0.01(2) -0.044(17) 0.00(2)
C7 0.060(4) 0.053(3) 0.035(3) 0.010(3) 0.001(3) 0.002(3)
C10 0.043(3) 0.073(4) 0.052(4) 0.003(3) -0.007(3) -0.004(3)
O5 0.073(3) 0.040(2) 0.058(3) -0.005(2) 0.025(2) 0.002(2)
O6 0.053(4) 0.124(7) 0.079(5) 0.000 -0.013(4) 0.000
N7 0.046(4) 0.054(5) 0.050(4) 0.000 0.013(4) 0.000
O11 0.049(5) 0.088(6) 0.042(5) -0.006(4) -0.003(4) 0.033(5)
N11 0.040(2) 0.040(2) 0.040(2) 0.001(3) 0.001(3) 0.001(3)
C31 0.027(6) 0.053(8) 0.125(14) -0.010(9) 0.000 0.000
C32A 0.015(7) 0.039(8) 0.036(8) -0.004(7) 0.000 0.000
N31A 0.008(7) 0.058(13) 0.083(16) 0.001(12) 0.000 0.000
 
_geom_special_details
;
 All esds (except the esd in the dihedral angle between two l.s. planes)
 are estimated using the full covariance matrix.  The cell esds are taken
 into account individually in the estimation of esds in distances, angles
 and torsion angles; correlations between esds in cell parameters are only
 used when they are defined by crystal symmetry.  An approximate (isotropic)
 treatment of cell esds is used for estimating esds involving l.s. planes.
;
 
loop_
 _geom_bond_atom_site_label_1
 _geom_bond_atom_site_label_2
 _geom_bond_distance
 _geom_bond_site_symmetry_2
 _geom_bond_publ_flag
In1 O3 2.163(3) . ?
In1 O1 2.179(3) . ?
In1 N5 2.218(4) . ?
In1 N6 2.240(4) . ?
In1 N1 2.257(4) . ?
In1 N3 2.282(4) . ?
K1 N4 2.831(6) . ?
K1 N4 2.831(6) 27 ?
K1 O5 2.840(5) 27 ?
K1 O5 2.840(5) 4_556 ?
K1 O5 2.840(5) 26_556 ?
K1 O5 2.840(5) . ?
K1 O21 2.96(3) . ?
K1 O21 2.96(3) 27 ?
K1 N31B 2.98(2) 45 ?
K1 N31B 2.98(2) 22_545 ?
K1 N7 3.234(8) . ?
K1 N7 3.234(8) 26_556 ?
K2 O2 2.639(4) 19 ?
K2 O2 2.639(4) 41 ?
K2 O62 2.667(16) . ?
K2 O62 2.667(16) 26_556 ?
K2 O5 2.696(4) 26_556 ?
K2 O5 2.696(4) . ?
K2 O61 2.795(4) . ?
K2 O61 2.795(4) 26_556 ?
K2 O22 2.96(2) 41 ?
K2 O63 3.038(14) . ?
K2 N31A 3.121(16) . ?
K2 N31A 3.121(16) 26_556 ?
O1 C2 1.298(6) . ?
O2 C2 1.226(6) . ?
O2 K2 2.639(4) 45 ?
O3 C4 1.301(6) . ?
O4 C4 1.231(6) . ?
N1 N2 1.342(5) . ?
N1 C1 1.344(6) . ?
N2 N1 1.342(5) 27 ?
N3 C3 1.345(6) . ?
N3 N4 1.355(5) . ?
N4 N3 1.355(5) 26_556 ?
C1 C1 1.394(9) 27 ?
C1 C2 1.493(7) . ?
C3 C3 1.382(9) 26_556 ?
C3 C4 1.500(7) . ?
N5 C5' 1.580(18) . ?
N5 H5A 0.9000 . ?
N5 H5B 0.9001 . ?
N5 H5C 0.9000 . ?
N5 H5D 0.9000 . ?
N6 C6' 1.431(18) . ?
N6 H6A 0.9000 . ?
N6 H6B 0.9000 . ?
N6 H6C 0.9000 . ?
N6 H6D 0.9000 . ?
C5 C6 1.528(16) . ?
C5 H5 0.9800 . ?
C6 H6 0.9800 . ?
C8 C9 1.53(2) . ?
C8 H8A 0.9700 . ?
C8 H8B 0.9700 . ?
C8 H8'2 1.2759 . ?
C8 H9'2 1.1813 . ?
C9 H9A 0.9700 . ?
C9 H9B 0.9700 . ?
C9 H9'1 1.0480 . ?
C5' C6' 1.54(3) . ?
C5' C10 1.55(2) . ?
C5' H5' 0.9800 . ?
C6' C7 1.513(17) . ?
C6' H6' 0.9800 . ?
C8' C9' 1.44(5) . ?
C8' C7 1.47(3) . ?
C8' H8B 0.9719 . ?
C8' H8'1 0.9700 . ?
C8' H8'2 0.9700 . ?
C9' H9B 1.1630 . ?
C9' H9'1 0.9700 . ?
C9' H9'2 0.9700 . ?
C7 H7A 0.9700 . ?
C7 H7B 0.9700 . ?
C7 H7C 0.9700 . ?
C7 H7D 0.9700 . ?
C10 H10A 0.9700 . ?
C10 H10B 0.9700 . ?
C10 H10C 0.9700 . ?
C10 H10D 0.9700 . ?
O5 N7 1.240(5) . ?
O6 N7 1.238(10) . ?
N7 O5 1.240(5) 27 ?
O11 N11 1.255(7) . ?
O11 O11 1.260(7) 41 ?
O11 O11 1.260(7) 45 ?
N11 O11 1.255(7) 45 ?
N11 O11 1.255(7) 37 ?
N11 O11 1.255(7) 5 ?
N11 O11 1.255(7) 41 ?
N11 O11 1.255(7) 9 ?
O21 N31B 0.60(3) 45 ?
O21 C32B 0.91(4) 45 ?
O21 N21 1.234(18) . ?
O21 N31B 1.62(4) 22_545 ?
N21 N31B 0.65(3) 22_545 ?
N21 N31B 0.65(3) 45 ?
N21 O21 1.234(18) 27 ?
N21 O22 1.250(19) . ?
N21 C32B 1.546(19) 45 ?
N21 C32B 1.546(19) 22_545 ?
O22 N31B 1.72(4) 22_545 ?
O22 N31B 1.72(4) 45 ?
O22 C32B 1.84(3) 45 ?
O22 C32B 1.84(3) 22_545 ?
O22 K2 2.96(2) 45 ?
O22 K2 2.96(2) 47_545 ?
C31 C32A 1.375(16) . ?
C31 C32B 1.497(16) . ?
C32A N31A 1.132(16) . ?
N31A O62 1.70(3) . ?
N31A K2 3.121(16) 3_556 ?
C32B O21 0.91(4) 41 ?
C32B N31B 1.182(18) . ?
C32B N21 1.546(19) 41 ?
C32B O22 1.84(3) 41 ?
N31B O21 0.60(3) 41 ?
N31B N21 0.65(3) 41 ?
N31B N31B 1.04(4) 26_556 ?
N31B O21 1.62(4) 19 ?
N31B O22 1.72(4) 41 ?
N31B K1 2.98(2) 41 ?
O41 N41 0.61(4) . ?
O41 C43 1.60(5) . ?
N41 C43 1.138(18) . ?
C42 C43 1.446(19) . ?
C51 C52 1.23(5) . ?
C52 N51 1.36(5) . ?
O61 O61 0.743(17) 26_556 ?
O61 O63 1.224(10) 25_556 ?
O61 O63 1.224(10) . ?
O61 K2 2.795(4) 27 ?
O62 O63 1.42(3) . ?
O62 K2 2.667(16) 3_556 ?
O63 O63 0.89(4) 25_556 ?
O63 O61 1.224(10) 2 ?
O63 O61 1.224(10) 25_556 ?
O63 O61 1.224(10) 26_556 ?
O63 O62 1.42(3) 26_556 ?
O63 K2 3.038(14) 3_556 ?
 
loop_
 _geom_angle_atom_site_label_1
 _geom_angle_atom_site_label_2
 _geom_angle_atom_site_label_3
 _geom_angle
 _geom_angle_site_symmetry_1
 _geom_angle_site_symmetry_3
 _geom_angle_publ_flag
O3 In1 O1 91.65(13) . . ?
O3 In1 N5 102.75(15) . . ?
O1 In1 N5 164.21(14) . . ?
O3 In1 N6 84.67(14) . . ?
O1 In1 N6 96.12(14) . . ?
N5 In1 N6 79.05(15) . . ?
O3 In1 N1 163.85(14) . . ?
O1 In1 N1 73.64(13) . . ?
N5 In1 N1 92.68(15) . . ?
N6 In1 N1 103.16(14) . . ?
O3 In1 N3 73.63(13) . . ?
O1 In1 N3 90.46(13) . . ?
N5 In1 N3 99.70(14) . . ?
N6 In1 N3 157.50(15) . . ?
N1 In1 N3 99.33(14) . . ?
N4 K1 N4 160.5(3) . 27 ?
N4 K1 O5 119.20(13) . 27 ?
N4 K1 O5 75.19(12) 27 27 ?
N4 K1 O5 119.20(13) . 4_556 ?
N4 K1 O5 75.19(12) 27 4_556 ?
O5 K1 O5 76.80(17) 27 4_556 ?
N4 K1 O5 75.19(12) . 26_556 ?
N4 K1 O5 119.20(13) 27 26_556 ?
O5 K1 O5 93.22(19) 27 26_556 ?
N4 K1 O5 75.19(12) . . ?
N4 K1 O5 119.20(13) 27 . ?
O5 K1 O5 93.22(19) 4_556 . ?
O5 K1 O5 76.80(17) 26_556 . ?
N4 K1 O21 58.6(4) . . ?
N4 K1 O21 101.9(5) 27 . ?
O5 K1 O21 141.05(11) 27 . ?
O5 K1 O21 141.05(11) 4_556 . ?
O5 K1 O21 119.9(3) 26_556 . ?
O5 K1 O21 119.9(3) . . ?
N4 K1 O21 101.9(5) . 27 ?
O5 K1 O21 119.9(3) 27 27 ?
O5 K1 O21 119.9(3) 4_556 27 ?
O5 K1 O21 141.05(11) 26_556 27 ?
O5 K1 O21 141.05(11) . 27 ?
N4 K1 N31B 90.4(5) 27 45 ?
O5 K1 N31B 137.94(19) 27 45 ?
O5 K1 N31B 137.94(19) 4_556 45 ?
O5 K1 N31B 127.6(3) 26_556 45 ?
O5 K1 N31B 127.6(3) . 45 ?
N4 K1 N31B 90.4(5) . 22_545 ?
O5 K1 N31B 127.6(3) 27 22_545 ?
O5 K1 N31B 127.6(3) 4_556 22_545 ?
O5 K1 N31B 137.94(19) 26_556 22_545 ?
O5 K1 N31B 137.94(19) . 22_545 ?
N4 K1 N7 96.84(9) . . ?
N4 K1 N7 96.84(9) 27 . ?
O5 K1 N7 87.56(15) 4_556 . ?
O5 K1 N7 87.56(15) 26_556 . ?
O21 K1 N7 130.86(18) . . ?
O21 K1 N7 130.86(18) 27 . ?
N31B K1 N7 133.88(14) 45 . ?
N31B K1 N7 133.88(14) 22_545 . ?
N4 K1 N7 96.84(9) . 26_556 ?
N4 K1 N7 96.84(9) 27 26_556 ?
O5 K1 N7 87.56(15) 27 26_556 ?
O5 K1 N7 87.56(15) . 26_556 ?
O21 K1 N7 130.86(18) . 26_556 ?
O21 K1 N7 130.86(18) 27 26_556 ?
N31B K1 N7 133.88(14) 45 26_556 ?
N31B K1 N7 133.88(14) 22_545 26_556 ?
N7 K1 N7 90.5(2) . 26_556 ?
O2 K2 O2 71.25(15) 19 41 ?
O2 K2 O62 141.8(5) 19 . ?
O2 K2 O62 110.1(6) 41 . ?
O2 K2 O62 110.1(6) 19 26_556 ?
O2 K2 O62 141.8(5) 41 26_556 ?
O2 K2 O5 81.91(12) 19 26_556 ?
O2 K2 O5 128.42(15) 41 26_556 ?
O62 K2 O5 117.9(6) . 26_556 ?
O62 K2 O5 88.3(5) 26_556 26_556 ?
O2 K2 O5 128.42(15) 19 . ?
O2 K2 O5 81.91(12) 41 . ?
O62 K2 O5 88.3(5) . . ?
O62 K2 O5 117.9(6) 26_556 . ?
O5 K2 O5 81.7(2) 26_556 . ?
O2 K2 O61 151.97(19) 19 . ?
O2 K2 O61 136.71(19) 41 . ?
O62 K2 O61 40.8(6) . . ?
O62 K2 O61 49.0(6) 26_556 . ?
O5 K2 O61 79.30(19) 26_556 . ?
O5 K2 O61 68.9(2) . . ?
O2 K2 O61 136.71(19) 19 26_556 ?
O2 K2 O61 151.97(19) 41 26_556 ?
O5 K2 O61 68.9(2) 26_556 26_556 ?
O5 K2 O61 79.30(19) . 26_556 ?
O2 K2 O22 74.6(4) 19 41 ?
O2 K2 O22 74.6(4) 41 41 ?
O62 K2 O22 69.6(7) . 41 ?
O62 K2 O22 69.6(7) 26_556 41 ?
O5 K2 O22 138.98(11) 26_556 41 ?
O5 K2 O22 138.98(11) . 41 ?
O61 K2 O22 107.3(5) . 41 ?
O61 K2 O22 107.3(5) 26_556 41 ?
O2 K2 O63 137.83(17) 19 . ?
O2 K2 O63 137.83(17) 41 . ?
O5 K2 O63 90.9(2) 26_556 . ?
O5 K2 O63 90.9(2) . . ?
O22 K2 O63 84.9(6) 41 . ?
O2 K2 N31A 126.8(4) 19 . ?
O2 K2 N31A 77.2(3) 41 . ?
O62 K2 N31A 72.3(6) 26_556 . ?
O5 K2 N31A 149.2(3) 26_556 . ?
O5 K2 N31A 86.5(4) . . ?
O61 K2 N31A 81.0(4) 26_556 . ?
O2 K2 N31A 126.8(4) 41 26_556 ?
O5 K2 N31A 86.5(4) 26_556 26_556 ?
O5 K2 N31A 149.2(3) . 26_556 ?
O61 K2 N31A 81.0(4) . 26_556 ?
N31A K2 N31A 89.4(6) . 26_556 ?
C2 O1 In1 119.7(3) . . ?
C2 O2 K2 151.8(3) . 45 ?
C4 O3 In1 120.6(3) . . ?
N2 N1 C1 110.4(4) . . ?
N2 N1 In1 135.3(3) . . ?
C1 N1 In1 114.2(3) . . ?
N1 N2 N1 106.5(5) . 27 ?
C3 N3 N4 110.3(4) . . ?
C3 N3 In1 113.4(3) . . ?
N4 N3 In1 136.1(3) . . ?
N3 N4 N3 105.7(5) 26_556 . ?
N3 N4 K1 127.1(3) 26_556 . ?
N3 N4 K1 127.1(3) . . ?
N1 C1 C1 106.3(3) . 27 ?
N1 C1 C2 117.1(4) . . ?
C1 C1 C2 136.6(3) 27 . ?
O2 C2 O1 122.8(4) . . ?
O2 C2 C1 121.9(4) . . ?
O1 C2 C1 115.3(4) . . ?
N3 C3 C3 106.8(3) . 26_556 ?
N3 C3 C4 117.3(4) . . ?
C3 C3 C4 135.9(3) 26_556 . ?
O4 C4 O3 123.3(5) . . ?
O4 C4 C3 121.9(5) . . ?
O3 C4 C3 114.9(4) . . ?
C5' N5 In1 106.9(7) . . ?
C5' N5 H5A 109.3 . . ?
In1 N5 H5A 110.1 . . ?
C5' N5 H5B 111.6 . . ?
In1 N5 H5B 110.3 . . ?
H5A N5 H5B 108.5 . . ?
C5' N5 H5C 132.8 . . ?
In1 N5 H5C 109.6 . . ?
H5B N5 H5C 82.3 . . ?
C5' N5 H5D 85.9 . . ?
In1 N5 H5D 109.8 . . ?
H5A N5 H5D 130.2 . . ?
H5C N5 H5D 108.2 . . ?
C6' N6 In1 110.9(7) . . ?
C6' N6 H6A 107.2 . . ?
In1 N6 H6A 109.4 . . ?
C6' N6 H6B 111.5 . . ?
In1 N6 H6B 109.6 . . ?
H6A N6 H6B 108.1 . . ?
C6' N6 H6C 128.9 . . ?
In1 N6 H6C 110.1 . . ?
H6B N6 H6C 81.2 . . ?
C6' N6 H6D 84.2 . . ?
In1 N6 H6D 110.3 . . ?
H6A N6 H6D 130.9 . . ?
H6C N6 H6D 108.5 . . ?
C6 C5 H5 108.8 . . ?
C5 C6 H6 108.1 . . ?
C9 C8 H8A 111.3 . . ?
C9 C8 H8B 106.3 . . ?
H8A C8 H8B 107.4 . . ?
C9 C8 H8'2 106.4 . . ?
H8A C8 H8'2 122.2 . . ?
C9 C8 H9'2 77.8 . . ?
H8B C8 H9'2 131.4 . . ?
H8'2 C8 H9'2 149.4 . . ?
C8 C9 H9A 112.1 . . ?
C8 C9 H9B 107.4 . . ?
H9A C9 H9B 107.8 . . ?
H9A C9 H9'1 114.5 . . ?
C6' C5' C10 114.7(15) . . ?
C6' C5' N5 107.7(16) . . ?
C10 C5' N5 105.3(12) . . ?
C10 C5' H6 129.2 . . ?
N5 C5' H6 121.7 . . ?
C6' C5' H5' 108.9 . . ?
C10 C5' H5' 109.9 . . ?
N5 C5' H5' 110.3 . . ?
N6 C6' C7 116.1(13) . . ?
N6 C6' C5' 108.3(15) . . ?
C7 C6' C5' 104.2(17) . . ?
N6 C6' H6' 109.2 . . ?
C7 C6' H6' 109.6 . . ?
C5' C6' H6' 109.1 . . ?
C9' C8' C7 104(2) . . ?
C9' C8' H8B 88.2 . . ?
C7 C8' H8B 114.5 . . ?
C9' C8' H8'1 107.6 . . ?
C7 C8' H8'1 108.8 . . ?
H8B C8' H8'1 128.6 . . ?
C9' C8' H8'2 114.7 . . ?
C7 C8' H8'2 112.1 . . ?
H8'1 C8' H8'2 109.8 . . ?
C8' C9' C10 111(3) . . ?
C8' C9' H8A 79.4 . . ?
C10 C9' H8A 131.5 . . ?
C8' C9' H9B 121.2 . . ?
C10 C9' H9B 86.8 . . ?
H8A C9' H9B 129.8 . . ?
C8' C9' H9'1 111.6 . . ?
C10 C9' H9'1 111.3 . . ?
H8A C9' H9'1 107.7 . . ?
C8' C9' H9'2 106.0 . . ?
C10 C9' H9'2 108.4 . . ?
H9B C9' H9'2 121.2 . . ?
H9'1 C9' H9'2 108.7 . . ?
C8' C7 C6' 114.6(16) . . ?
C8' C7 H7A 105.0 . . ?
C6' C7 H7A 106.7 . . ?
C8' C7 H7B 111.7 . . ?
C6' C7 H7B 110.5 . . ?
H7A C7 H7B 107.8 . . ?
C8' C7 H7C 80.8 . . ?
C6' C7 H7C 83.5 . . ?
H7A C7 H7C 164.1 . . ?
C8' C7 H7D 122.8 . . ?
C6' C7 H7D 122.4 . . ?
H7A C7 H7D 56.3 . . ?
H7B C7 H7D 51.5 . . ?
H7C C7 H7D 108.0 . . ?
C5' C10 C9' 99.7(15) . . ?
C5' C10 H10A 113.4 . . ?
C9' C10 H10A 113.1 . . ?
C5' C10 H10B 110.5 . . ?
C9' C10 H10B 110.1 . . ?
H10A C10 H10B 109.8 . . ?
C5' C10 H10C 128.7 . . ?
C9' C10 H10C 129.7 . . ?
H10A C10 H10C 63.7 . . ?
C5' C10 H10D 83.3 . . ?
C9' C10 H10D 88.9 . . ?
H10B C10 H10D 153.3 . . ?
H10C C10 H10D 107.4 . . ?
N7 O5 K2 127.5(4) . . ?
N7 O5 K1 97.0(4) . . ?
K2 O5 K1 99.27(15) . . ?
O6 N7 O5 120.2(4) . 27 ?
O6 N7 O5 120.2(4) . . ?
O5 N7 O5 119.5(8) 27 . ?
O6 N7 K1 163.3(6) . . ?
O5 N7 K1 60.6(4) 27 . ?
O5 N7 K1 60.6(4) . . ?
N11 O11 O11 59.87(4) . 41 ?
N11 O11 O11 59.87(4) . 45 ?
O11 O11 O11 119.0(3) 41 45 ?
O11 N11 O11 60.26(8) . 45 ?
O11 N11 O11 180.0(11) . 37 ?
O11 N11 O11 119.74(8) 45 37 ?
O11 N11 O11 119.74(8) . 5 ?
O11 N11 O11 60.26(8) 45 5 ?
O11 N11 O11 60.26(8) 37 5 ?
O11 N11 O11 60.26(8) . 41 ?
O11 N11 O11 119.74(8) 45 41 ?
O11 N11 O11 119.74(8) 37 41 ?
O11 N11 O11 180.0(11) 5 41 ?
O11 N11 O11 119.74(8) . 9 ?
O11 N11 O11 180.0(9) 45 9 ?
O11 N11 O11 60.26(8) 37 9 ?
O11 N11 O11 119.74(8) 5 9 ?
O11 N11 O11 60.26(8) 41 9 ?
N31B O21 C32B 101(5) 45 45 ?
C32B O21 N21 91(2) 45 . ?
C32B O21 N31B 112(3) 45 22_545 ?
N31B O21 K1 86(4) 45 . ?
C32B O21 K1 173(2) 45 . ?
N21 O21 K1 96(3) . . ?
N31B O21 K1 74.8(17) 22_545 . ?
N31B N21 N31B 106(7) 22_545 45 ?
N31B N21 O21 115(5) 22_545 . ?
N31B N21 O21 115(5) 45 27 ?
O21 N21 O21 124(4) . 27 ?
N31B N21 O22 127(3) 22_545 . ?
N31B N21 O22 127(4) 45 . ?
O21 N21 O22 118(2) . . ?
O21 N21 O22 118(2) 27 . ?
N31B N21 C32B 151(5) 22_545 45 ?
O21 N21 C32B 161(4) 27 45 ?
O22 N21 C32B 81.6(18) . 45 ?
N31B N21 C32B 151(5) 45 22_545 ?
O21 N21 C32B 161(4) . 22_545 ?
O22 N21 C32B 81.6(18) . 22_545 ?
C32B N21 C32B 163(4) 45 22_545 ?
O22 N21 K1 180.000(3) . . ?
C32B N21 K1 98.4(18) 45 . ?
C32B N21 K1 98.4(18) 22_545 . ?
N31B O22 C32B 73.8(19) 22_545 45 ?
N21 O22 C32B 56.2(12) . 22_545 ?
N31B O22 C32B 73.8(19) 45 22_545 ?
C32B O22 C32B 112(2) 45 22_545 ?
N21 O22 K2 131.6(5) . 45 ?
N31B O22 K2 129.3(4) 22_545 45 ?
N31B O22 K2 129.3(4) 45 45 ?
C32B O22 K2 111.7(5) 45 45 ?
C32B O22 K2 111.7(5) 22_545 45 ?
N21 O22 K2 131.6(5) . 47_545 ?
N31B O22 K2 129.3(4) 22_545 47_545 ?
N31B O22 K2 129.3(4) 45 47_545 ?
C32B O22 K2 111.7(5) 45 47_545 ?
C32B O22 K2 111.7(5) 22_545 47_545 ?
K2 O22 K2 96.7(10) 45 47_545 ?
C32A C31 C32B 90.6(16) . . ?
N31A C32A C31 180(2) . . ?
C32A N31A O62 153(2) . . ?
C32A N31A K2 104.6(12) . . ?
C32A N31A K2 104.6(12) . 3_556 ?
O62 N31A K2 58.7(7) . 3_556 ?
K2 N31A K2 90.4(6) . 3_556 ?
O21 C32B C31 137(3) 41 . ?
N31B C32B C31 167(3) . . ?
O21 C32B N21 52.9(16) 41 41 ?
C31 C32B N21 170(3) . 41 ?
O21 C32B O22 95.1(19) 41 41 ?
N31B C32B O22 65.3(18) . 41 ?
C31 C32B O22 128(2) . 41 ?
O21 N31B N21 161(7) 41 41 ?
O21 N31B N31B 162(4) 41 26_556 ?
N21 N31B C32B 112(4) 41 . ?
N31B N31B C32B 148.6(19) 26_556 . ?
O21 N31B O21 156(6) 41 19 ?
C32B N31B O21 155(3) . 19 ?
O21 N31B O22 126(5) 41 41 ?
N31B N31B O22 72.4(9) 26_556 41 ?
C32B N31B O22 76.2(18) . 41 ?
O21 N31B O22 78.9(18) 19 41 ?
O21 N31B K1 82(4) 41 41 ?
N21 N31B K1 117(4) 41 41 ?
N31B N31B K1 79.9(4) 26_556 41 ?
C32B N31B K1 132(2) . 41 ?
O21 N31B K1 73.4(15) 19 41 ?
O22 N31B K1 152.3(12) 41 41 ?
O41 N41 C43 130(6) . . ?
N41 C43 C42 178(4) . . ?
C42 C43 O41 165(4) . . ?
C51 C52 N51 180.000(4) . . ?
O61 O61 O63 72.3(4) 26_556 25_556 ?
O61 O61 O63 72.3(4) 26_556 . ?
O61 O61 K2 82.36(17) 26_556 . ?
O63 O61 K2 130.3(10) 25_556 . ?
O63 O61 K2 89.4(9) . . ?
O61 O61 K2 82.36(18) 26_556 27 ?
O63 O61 K2 89.4(9) 25_556 27 ?
O63 O61 K2 130.3(10) . 27 ?
K2 O61 K2 129.4(3) . 27 ?
O63 O62 N31A 178(2) . . ?
O63 O62 K2 90.8(10) . . ?
N31A O62 K2 88.3(9) . . ?
O63 O62 K2 90.8(10) . 3_556 ?
N31A O62 K2 88.3(9) . 3_556 ?
K2 O62 K2 112.2(10) . 3_556 ?
O63 O63 O61 68.7(9) 25_556 . ?
O63 O63 O61 68.7(9) 25_556 2 ?
O61 O63 O61 123.4(15) . 2 ?
O63 O63 O61 68.7(9) 25_556 25_556 ?
O61 O63 O61 137.3(19) . 25_556 ?
O63 O63 O61 68.7(9) 25_556 26_556 ?
O61 O63 O61 137.3(19) 2 26_556 ?
O61 O63 O61 123.4(15) 25_556 26_556 ?
O63 O63 O62 134.4(13) 25_556 . ?
O61 O63 O62 92.1(7) . . ?
O61 O63 O62 92.1(7) 2 . ?
O61 O63 O62 118.1(6) 25_556 . ?
O61 O63 O62 118.1(6) 26_556 . ?
O63 O63 O62 134.4(13) 25_556 26_556 ?
O61 O63 O62 118.1(6) . 26_556 ?
O61 O63 O62 118.1(6) 2 26_556 ?
O61 O63 O62 92.1(7) 25_556 26_556 ?
O61 O63 O62 92.1(7) 26_556 26_556 ?
O62 O63 O62 91(3) . 26_556 ?
O63 O63 K2 133.2(3) 25_556 . ?
O61 O63 K2 153.0(10) 2 . ?
O61 O63 K2 153.0(10) 25_556 . ?
O63 O63 K2 133.2(3) 25_556 3_556 ?
O61 O63 K2 153.0(10) . 3_556 ?
O61 O63 K2 153.0(10) 26_556 3_556 ?
K2 O63 K2 93.5(6) . 3_556 ?

loop_
 _geom_torsion_atom_site_label_1
 _geom_torsion_atom_site_label_2
 _geom_torsion_atom_site_label_3
 _geom_torsion_atom_site_label_4
 _geom_torsion
 _geom_torsion_site_symmetry_1
 _geom_torsion_site_symmetry_2
 _geom_torsion_site_symmetry_3
 _geom_torsion_site_symmetry_4
 _geom_torsion_publ_flag
O3 In1 O1 C2 170.4(3) . . . . ?
N5 In1 O1 C2 -33.6(7) . . . . ?
N6 In1 O1 C2 -104.8(3) . . . . ?
N1 In1 O1 C2 -2.8(3) . . . . ?
N3 In1 O1 C2 96.8(3) . . . . ?
O1 In1 O3 C4 -87.1(4) . . . . ?
N5 In1 O3 C4 99.4(4) . . . . ?
N6 In1 O3 C4 176.9(4) . . . . ?
N1 In1 O3 C4 -63.1(7) . . . . ?
N3 In1 O3 C4 2.9(3) . . . . ?
O3 In1 N1 N2 153.5(5) . . . . ?
O1 In1 N1 N2 178.6(5) . . . . ?
N5 In1 N1 N2 -9.4(5) . . . . ?
N6 In1 N1 N2 -88.8(5) . . . . ?
N3 In1 N1 N2 90.8(5) . . . . ?
O3 In1 N1 C1 -22.2(7) . . . . ?
O1 In1 N1 C1 2.9(3) . . . . ?
N5 In1 N1 C1 174.9(3) . . . . ?
N6 In1 N1 C1 95.5(3) . . . . ?
N3 In1 N1 C1 -84.8(3) . . . . ?
C1 N1 N2 N1 -0.6(7) . . . 27 ?
In1 N1 N2 N1 -176.39(12) . . . 27 ?
O3 In1 N3 C3 -4.3(3) . . . . ?
O1 In1 N3 C3 87.3(3) . . . . ?
N5 In1 N3 C3 -104.8(3) . . . . ?
N6 In1 N3 C3 -20.1(6) . . . . ?
N1 In1 N3 C3 160.8(3) . . . . ?
O3 In1 N3 N4 -178.7(5) . . . . ?
O1 In1 N3 N4 -87.1(5) . . . . ?
N5 In1 N3 N4 80.8(5) . . . . ?
N6 In1 N3 N4 165.6(5) . . . . ?
N1 In1 N3 N4 -13.6(5) . . . . ?
C3 N3 N4 N3 -0.6(6) . . . 26_556 ?
In1 N3 N4 N3 173.92(12) . . . 26_556 ?
C3 N3 N4 K1 -179.8(3) . . . . ?
In1 N3 N4 K1 -5.3(7) . . . . ?
N4 K1 N4 N3 -89.5(4) 27 . . 26_556 ?
O5 K1 N4 N3 135.8(4) 27 . . 26_556 ?
O5 K1 N4 N3 45.1(5) 4_556 . . 26_556 ?
O5 K1 N4 N3 50.5(4) 26_556 . . 26_556 ?
O5 K1 N4 N3 130.4(5) . . . 26_556 ?
O21 K1 N4 N3 -89.5(4) . . . 26_556 ?
O21 K1 N4 N3 -89.5(4) 27 . . 26_556 ?
N31B K1 N4 N3 -89.5(4) 45 . . 26_556 ?
N31B K1 N4 N3 -89.5(4) 22_545 . . 26_556 ?
N7 K1 N4 N3 136.1(4) . . . 26_556 ?
N7 K1 N4 N3 44.8(5) 26_556 . . 26_556 ?
N4 K1 N4 N3 89.5(4) 27 . . . ?
O5 K1 N4 N3 -45.1(5) 27 . . . ?
O5 K1 N4 N3 -135.8(4) 4_556 . . . ?
O5 K1 N4 N3 -130.4(5) 26_556 . . . ?
O5 K1 N4 N3 -50.5(4) . . . . ?
O21 K1 N4 N3 89.5(4) . . . . ?
O21 K1 N4 N3 89.5(4) 27 . . . ?
N31B K1 N4 N3 89.5(4) 45 . . . ?
N31B K1 N4 N3 89.5(4) 22_545 . . . ?
N7 K1 N4 N3 -44.8(5) . . . . ?
N7 K1 N4 N3 -136.1(4) 26_556 . . . ?
N2 N1 C1 C1 0.4(4) . . . 27 ?
In1 N1 C1 C1 177.13(14) . . . 27 ?
N2 N1 C1 C2 -179.6(4) . . . . ?
In1 N1 C1 C2 -2.9(5) . . . . ?
K2 O2 C2 O1 150.6(5) 45 . . . ?
K2 O2 C2 C1 -28.4(9) 45 . . . ?
In1 O1 C2 O2 -176.9(3) . . . . ?
In1 O1 C2 C1 2.2(5) . . . . ?
N1 C1 C2 O2 179.7(4) . . . . ?
C1 C1 C2 O2 -0.3(6) 27 . . . ?
N1 C1 C2 O1 0.6(6) . . . . ?
C1 C1 C2 O1 -179.4(2) 27 . . . ?
N4 N3 C3 C3 0.4(4) . . . 26_556 ?
In1 N3 C3 C3 -175.48(13) . . . 26_556 ?
N4 N3 C3 C4 -178.9(4) . . . . ?
In1 N3 C3 C4 5.3(5) . . . . ?
In1 O3 C4 O4 179.2(4) . . . . ?
In1 O3 C4 C3 -1.1(6) . . . . ?
N3 C3 C4 O4 176.6(5) . . . . ?
C3 C3 C4 O4 -2.3(7) 26_556 . . . ?
N3 C3 C4 O3 -3.0(6) . . . . ?
C3 C3 C4 O3 178.0(2) 26_556 . . . ?
O3 In1 N5 C5' 66.2(10) . . . . ?
O1 In1 N5 C5' -89.2(11) . . . . ?
N6 In1 N5 C5' -15.7(10) . . . . ?
N1 In1 N5 C5' -118.6(10) . . . . ?
N3 In1 N5 C5' 141.4(10) . . . . ?
O3 In1 N6 C6' -119.2(11) . . . . ?
O1 In1 N6 C6' 149.7(11) . . . . ?
N5 In1 N6 C6' -15.1(11) . . . . ?
N1 In1 N6 C6' 75.1(11) . . . . ?
N3 In1 N6 C6' -104.0(12) . . . . ?
In1 N5 C5' C6' 43.1(18) . . . . ?
In1 N5 C5' C10 165.9(10) . . . . ?
In1 N6 C6' C7 160.4(12) . . . . ?
In1 N6 C6' C5' 44(2) . . . . ?
C10 C5' C6' N6 -175.2(11) . . . . ?
N5 C5' C6' N6 -58(2) . . . . ?
C10 C5' C6' C7 61(2) . . . . ?
N5 C5' C6' C7 177.4(10) . . . . ?
C7 C8' C9' C10 -67(3) . . . . ?
C9' C8' C7 C6' 70(4) . . . . ?
N6 C6' C7 C8' 177.2(16) . . . . ?
C5' C6' C7 C8' -64(3) . . . . ?
C6' C5' C10 C9' -58(2) . . . . ?
N5 C5' C10 C9' -176.3(16) . . . . ?
C8' C9' C10 C5' 63(3) . . . . ?
O2 K2 O5 N7 165.8(5) 19 . . . ?
O2 K2 O5 N7 -136.0(6) 41 . . . ?
O5 K2 O5 N7 93.0(6) 26_556 . . . ?
N31A K2 O5 N7 -58.5(6) . . . . ?
N31A K2 O5 N7 24.5(9) 26_556 . . . ?
O2 K2 O5 K1 59.49(18) 19 . . . ?
O2 K2 O5 K1 117.67(14) 41 . . . ?
O5 K2 O5 K1 -13.25(19) 26_556 . . . ?
N4 K1 O5 N7 165.0(4) . . . . ?
N4 K1 O5 N7 -0.8(4) 27 . . . ?
O5 K1 O5 N7 -8.3(4) 27 . . . ?
O5 K1 O5 N7 -75.6(4) 4_556 . . . ?
O5 K1 O5 N7 -117.1(4) 26_556 . . . ?
O21 K1 O5 N7 125.8(5) . . . . ?
O21 K1 O5 N7 74.3(8) 27 . . . ?
N31B K1 O5 N7 115.3(6) 45 . . . ?
N31B K1 O5 N7 91.5(7) 22_545 . . . ?
N7 K1 O5 N7 -97.3(4) 26_556 . . . ?
N4 K1 O5 K2 -65.13(13) . . . . ?
N4 K1 O5 K2 129.07(14) 27 . . . ?
O5 K1 O5 K2 121.61(10) 27 . . . ?
O5 K1 O5 K2 54.25(9) 4_556 . . . ?
O5 K1 O5 K2 12.78(18) 26_556 . . . ?
O21 K1 O5 K2 -104.4(4) . . . . ?
O21 K1 O5 K2 -155.9(7) 27 . . . ?
N31B K1 O5 K2 -114.9(4) 45 . . . ?
N31B K1 O5 K2 -138.7(6) 22_545 . . . ?
N7 K1 O5 K2 129.9(4) . . . . ?
N7 K1 O5 K2 32.60(12) 26_556 . . . ?
K2 O5 N7 O6 91.9(8) . . . . ?
K1 O5 N7 O6 -160.8(7) . . . . ?
K2 O5 N7 O5 -92.1(8) . . . 27 ?
K1 O5 N7 O5 15.3(7) . . . 27 ?
K2 O5 N7 K1 -107.4(4) . . . . ?
N4 K1 N7 O6 83.05(9) . . . . ?
N4 K1 N7 O6 -83.05(9) 27 . . . ?
O5 K1 N7 O6 -97.6(4) 27 . . . ?
O5 K1 N7 O6 -157.82(8) 4_556 . . . ?
O5 K1 N7 O6 157.82(8) 26_556 . . . ?
O5 K1 N7 O6 97.6(4) . . . . ?
O21 K1 N7 O6 29.2(5) . . . . ?
O21 K1 N7 O6 -29.2(5) 27 . . . ?
N31B K1 N7 O6 14.1(6) 45 . . . ?
N31B K1 N7 O6 -14.1(6) 22_545 . . . ?
N7 K1 N7 O6 180.000(3) 26_556 . . . ?
N4 K1 N7 O5 -179.3(4) . . . 27 ?
N4 K1 N7 O5 14.6(4) 27 . . 27 ?
O5 K1 N7 O5 -60.2(4) 4_556 . . 27 ?
O5 K1 N7 O5 -104.5(4) 26_556 . . 27 ?
O5 K1 N7 O5 -164.7(7) . . . 27 ?
O21 K1 N7 O5 126.9(6) . . . 27 ?
O21 K1 N7 O5 68.4(7) 27 . . 27 ?
N31B K1 N7 O5 111.7(7) 45 . . 27 ?
N31B K1 N7 O5 83.6(7) 22_545 . . 27 ?
N7 K1 N7 O5 -82.4(4) 26_556 . . 27 ?
N4 K1 N7 O5 -14.6(4) . . . . ?
N4 K1 N7 O5 179.3(4) 27 . . . ?
O5 K1 N7 O5 164.7(7) 27 . . . ?
O5 K1 N7 O5 104.5(4) 4_556 . . . ?
O5 K1 N7 O5 60.2(4) 26_556 . . . ?
O21 K1 N7 O5 -68.4(7) . . . . ?
O21 K1 N7 O5 -126.9(6) 27 . . . ?
N7 K1 N7 O5 82.4(4) 26_556 . . . ?

 
_diffrn_measured_fraction_theta_max    0.997
_diffrn_reflns_theta_full              26.99
_diffrn_measured_fraction_theta_full   0.997
_refine_diff_density_max    1.157
_refine_diff_density_min   -0.833
_refine_diff_density_rms    0.127
